# Supplementary material
Source: PubMed Central journal article supplement (PMC9377718)
Supplement: NIHMS1822160-supplement-1.pdf [file NIHMS1822160-supplement-1.pdf]

### A) Model Results for Individuals with Lower Physical Capacity ( $\leq 312$ m on 6MWT)

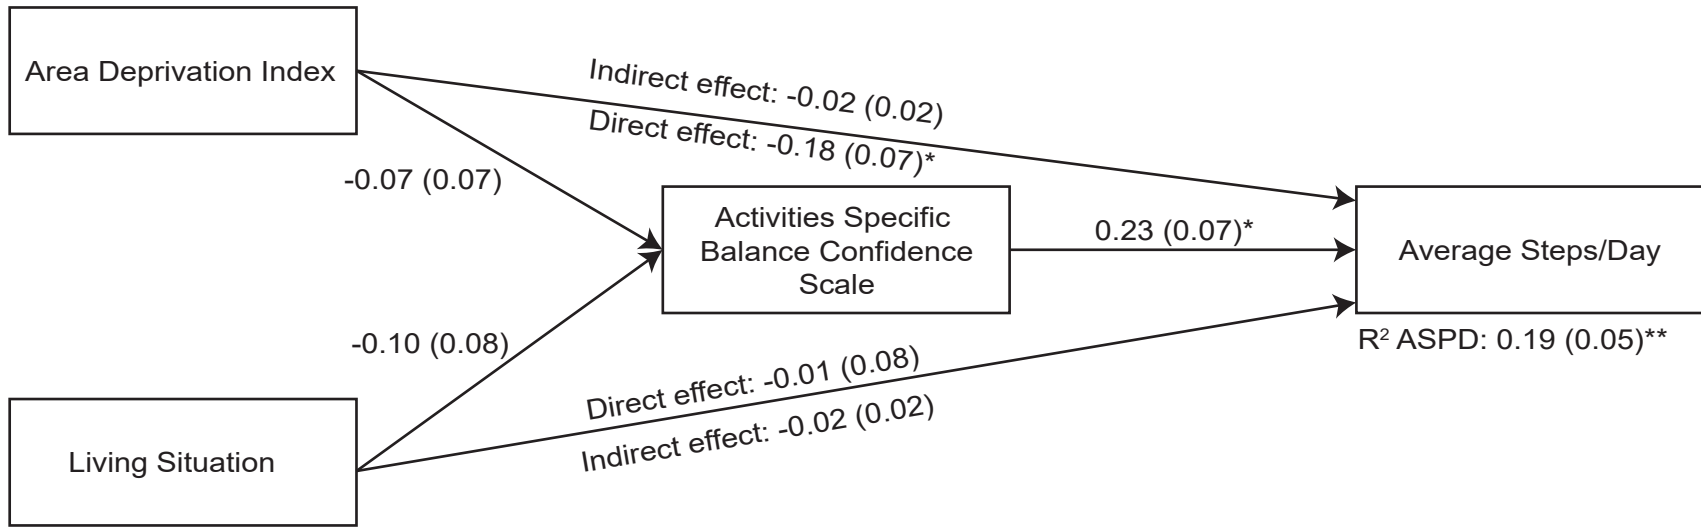

### B) Model Results for Individuals with Higher Physical Capacity ( $> 312$ m on 6MWT)

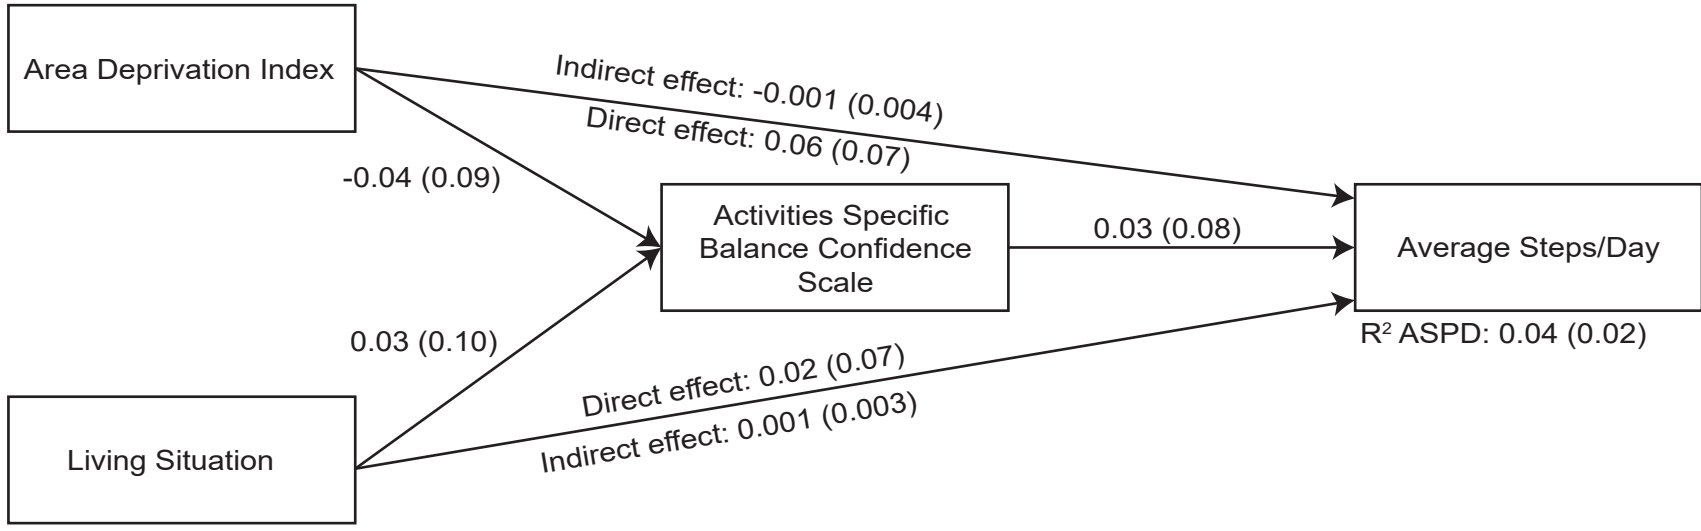

**Supplemental Figure 1. Results of Moderation Model.** The direct effects of Area Deprivation Index and living situation on average steps/day are displayed as solid black lines. The indirect effects of Area Deprivation Index and living situation on average steps/day through Activities Specific Balance Confidence Scale are displayed next to the line representing the direct effect. Standardized coefficients are displayed with standard errors in parentheses. All pathways are adjusted for assistive device use and comorbidities (Charlson Comorbidity Index, age-adjusted). A- Model results for individuals with lower physical capacity (6MWT  $\leq 312$  m). B- Model results for individuals with higher physical capacity (6MWT  $> 312$  m). Results of the  $\chi^2$  difference test suggested that physical capacity (6MWT) was not a moderator in the mediation model. \* $p < 0.05$ , \*\* $p < 0.001$ . Abbreviations: 6MWT- 6-Minute Walk Test.
